# Supplementary material for: High surface area hierarchical porous Al2O3 prepared by the integration of sol–gel transition and phase separation
Source: Royal Society of Chemistry journal article supplement (doi:10.1039/c6ra11477f), 2016-01-01
Supplement: c6ra11477f1.pdf [file c6ra11477f1.pdf]

Supplementary data

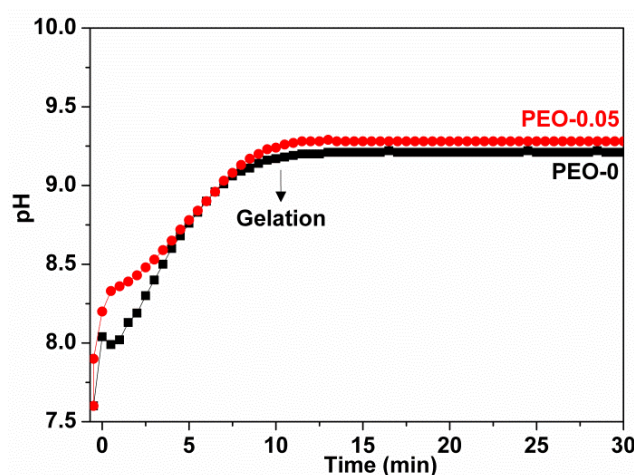

**Fig. S1** Thermogravimetric analysis of PEO, the gel-rich phase, and the solvent-rich phase.

**Table S1** Crystallite size and surface area estimated by the average crystallite size and determined from nitrogen adsorption-desorption isotherms of  $\text{Al}_2\text{O}_3$  samples prepared with different nominal volumes of PEO ( $V_{\text{PEO}}$ ).

| $\text{Al}_2\text{O}_3$ | Crystallite size (111) crystal<br>plane<br>(nm) | S from the Crystallite size<br>( $\text{m}^2 \text{g}^{-1}$ ) | $S_{\text{BET}} \text{N}_2$ physisorption<br>( $\text{m}^2 \text{g}^{-1}$ ) |
|-------------------------|-------------------------------------------------|---------------------------------------------------------------|-----------------------------------------------------------------------------|
| PEO-0                   | 3.6                                             | 454                                                           | 435                                                                         |
| PEO-0.001               | 3.8                                             | 430                                                           | 427                                                                         |
| PEO-0.01                | 3.7                                             | 442                                                           | 532                                                                         |
| PEO-0.03                | 3.5                                             | 476                                                           | 629                                                                         |
| PEO-0.05                | 3.4                                             | 609                                                           | 675                                                                         |
